# Supplementary material
Source: PubMed Central journal article supplement (PMC6459408)
Supplement: NIHMS1011767-supplement-1.pdf [file NIHMS1011767-supplement-1.pdf]

549 **Supplement**

550 **Supplementary Table 1.** Characteristics of primates whose tissues were included in study:  
551 tissues were collected from adult rhesus macaques that were euthanized for normal colony  
552 maintenance over a three-year period from 2015-2017 at the California National Primate  
553 Research Center.

| Primate ID | Date Euthanized | Age      | Sex    | Reason               |
|------------|-----------------|----------|--------|----------------------|
| 42731      | 9/30/15         | 3 years  | Female | Low BCS              |
| 37179      | 2/1/16          | 9 years  | Male   | Osteoarthritis       |
| 31370      | 2/10/16         | 16 years | Female | Arthritis            |
| 41225      | 3/7/16          | 5 years  | Male   | Arthritis            |
| 37219      | 5/24/16         | 10 years | Female | Diarrhea/weight loss |
| 43877      | 6/5/17          | 3 years  | Male   | Lameness             |
| 43142      | 6/6/17          | 4 years  | Female | Chronic diarrhea     |
| 36334      | 6/28/17         | 12 years | Female | Cull animal          |
| 39886      | 6/28/17         | 8 years  | Male   | Cull animal          |
| 40415      | 6/28/17         | 7 years  | Female | Cull animal          |

554

555
